# Supplementary material for: An Update on the Cosmetic Use of Botulinum Toxin: The Pattern of Practice among Korean Dermatologists
Source: MDPI journal article supplement (doi:10.3390/toxins14050329), 2022-05-04
Supplement: s1 [file s1]

# Supplementary Materials: An Update on the Cosmetic Use of Botulinum Toxin: The Pattern of Practice among Korean Dermatologists

Nark-Kyoung Rho, Kwang-Ho Han and Hei-Sung Kim

**Table S1.** On-label indications for different BoNT-A products available in Korea (full indication).

| Commercial name     | Manufacturer           | Essential blepharospasm | Hemifacial spasm | Strabismus | Dynamic equinus foot deformity | Cervical dystonia | Post-stroke upper limb spasticity | Chronic migraine | Neurogenic bladder | Axillary hyperhidrosis | Horizontal forehead dynamic lines | Glabellar dynamic wrinkles | Lateral canthal dynamic wrinkles |
|---------------------|------------------------|-------------------------|------------------|------------|--------------------------------|-------------------|-----------------------------------|------------------|--------------------|------------------------|-----------------------------------|----------------------------|----------------------------------|
| Botox®/Vistabel®    | Allergan (U.S.A.)      | ■                       |                  | ■          | ■                              | ■                 | ■                                 | ■                | ■                  | ■                      |                                   | ■                          | ■                                |
| Botox®/Vistabel®50U | Allergan (U.S.A.)      | ■                       |                  | ■          | ■                              |                   | ■                                 |                  |                    | ■                      |                                   | ■                          | ■                                |
| Botulax®            | Hugel (Korea)          | ■                       |                  |            | ■                              |                   | ■                                 |                  |                    |                        |                                   | ■                          | ■                                |
| Botulax®150U        | Hugel (Korea)          | ■                       |                  |            | ■                              |                   | ■                                 |                  |                    |                        |                                   | ■                          | ■                                |
| Botulax®200U        | Hugel (Korea)          | ■                       |                  |            | ■                              |                   | ■                                 |                  |                    |                        |                                   | ■                          | ■                                |
| Botulax®300U        | Hugel (Korea)          |                         |                  |            | ■                              |                   | ■                                 |                  |                    |                        |                                   |                            |                                  |
| Botulax®50U         | Hugel (Korea)          | ■                       |                  |            | ■                              |                   | ■                                 |                  |                    |                        |                                   | ■                          | ■                                |
| BTX-A®              | Lanzhou (China)        | ■                       | ■                | ■          |                                |                   |                                   |                  |                    |                        |                                   |                            |                                  |
| Coretox®            | Medy-Tox (Korea)       |                         |                  |            |                                |                   | ■                                 |                  |                    |                        |                                   | ■                          |                                  |
| Dysport®/Azzalure®  | Galderma (Switzerland) | ■                       | ■                |            | ■                              | ■                 | ■                                 |                  |                    |                        |                                   | ■                          |                                  |
| Innotox®            | Medy-Tox (Korea)       |                         |                  |            |                                |                   |                                   |                  |                    |                        |                                   | ■                          |                                  |
| Liztox®100U         | Huons (Korea)          |                         |                  |            |                                |                   |                                   |                  |                    |                        |                                   | ■                          | ■                                |
| Liztox®200U         | Huons (Korea)          |                         |                  |            |                                |                   |                                   |                  |                    |                        |                                   | ■                          | ■                                |
| Liztox®50U          | Huons (Korea)          |                         |                  |            |                                |                   |                                   |                  |                    |                        |                                   | ■                          | ■                                |

|                          |                  |   |  |  |   |   |   |  |  |  |   |   |   |
|--------------------------|------------------|---|--|--|---|---|---|--|--|--|---|---|---|
| Meditoxin®/Neuronox®     | Medy-Tox (Korea) | ■ |  |  | ■ | ■ | ■ |  |  |  |   | ■ | ■ |
| Meditoxin®/Neuronox®150U | Medy-Tox (Korea) | ■ |  |  | ■ | ■ | ■ |  |  |  |   | ■ | ■ |
| Meditoxin®/Neuronox®200U | Medy-Tox (Korea) | ■ |  |  | ■ | ■ | ■ |  |  |  |   | ■ | ■ |
| Meditoxin®/Neuronox®50U  | Medy-Tox (Korea) | ■ |  |  | ■ | ■ | ■ |  |  |  |   | ■ | ■ |
| Nabota®/Jeuveau®         | Daewoong (Korea) | ■ |  |  |   |   | ■ |  |  |  |   | ■ | ■ |
| Nabota®/Jeuveau®150U     | Daewoong (Korea) | ■ |  |  |   |   | ■ |  |  |  |   | ■ | ■ |
| Nabota®/Jeuveau®200U     | Daewoong (Korea) | ■ |  |  |   |   | ■ |  |  |  |   | ■ | ■ |
| Nabota®/Jeuveau®25U      | Daewoong (Korea) |   |  |  |   |   | ■ |  |  |  |   | ■ |   |
| Nabota®/Jeuveau®50U      | Daewoong (Korea) | ■ |  |  |   |   | ■ |  |  |  |   | ■ | ■ |
| Xeomin®/Bocouture®       | Merz (Germany)   |   |  |  |   |   |   |  |  |  | ■ | ■ | ■ |
| Xeomin®/Bocouture®50U    | Merz (Germany)   |   |  |  |   |   |   |  |  |  | ■ | ■ | ■ |

■: On-label indication

**Table S2.** On-label indications for export-only Korea BoNT-A products (full indication).

| Commercial name       | Manufacturer           | Essential blepharospasm | Hemifacial spasm | Strabismus | Dynamic equinus foot deformity | Cervical dystonia | Post-stroke upper limb spasticity | Chronic migraine | Neurogenic bladder | Axillary hyperhidrosis | Horizontal forehead dynamic lines | Glabellar dynamic wrinkles | Lateral canthal dynamic wrinkles |
|-----------------------|------------------------|-------------------------|------------------|------------|--------------------------------|-------------------|-----------------------------------|------------------|--------------------|------------------------|-----------------------------------|----------------------------|----------------------------------|
| Bienox®               | BNC Korea (Korea)      |                         |                  |            |                                |                   |                                   |                  |                    |                        |                                   | ■                          |                                  |
| Hitox®                | BMI Korea (Korea)      |                         |                  |            |                                |                   |                                   |                  |                    |                        |                                   | ■                          |                                  |
| Inibo®                | Inibio (Korea)         |                         |                  |            |                                |                   |                                   |                  |                    |                        |                                   | ■                          |                                  |
| Jetema The Toxin®100U | Jetema (Korea)         |                         |                  |            |                                |                   |                                   |                  |                    |                        |                                   | ■                          |                                  |
| Jetema The Toxin®200U | Jetema (Korea)         |                         |                  |            |                                |                   |                                   |                  |                    |                        |                                   | ■                          |                                  |
| Protoxin®100U         | Protox (Korea)         |                         |                  |            |                                |                   |                                   |                  |                    |                        |                                   | ■                          |                                  |
| ReNTOX®100U           | PharmaResearch (Korea) |                         |                  |            |                                |                   |                                   |                  |                    |                        |                                   | ■                          |                                  |
| Tyemvers®             | Chong Kun Dang (Korea) |                         |                  |            |                                |                   |                                   |                  |                    |                        |                                   | ■                          |                                  |

■: On-label indication
